# Supplementary material
Source: publisher site journal article supplement (https://www.spandidos-publications.com/1979/downloadSupplementary)

Figure S1. Viability of pancreatic ductal adenocarcinoma cells following treatment with siRNA targeting RHAMM. No significant cytotoxicity was observed following treatment with RHAMM siRNA (100 nM) for 24 h. Data are presented as the mean  $\pm$  SD of three replicates. RHAMM, receptor for hyaluronic acid-mediated motility; siRNA, small interfering RNA.

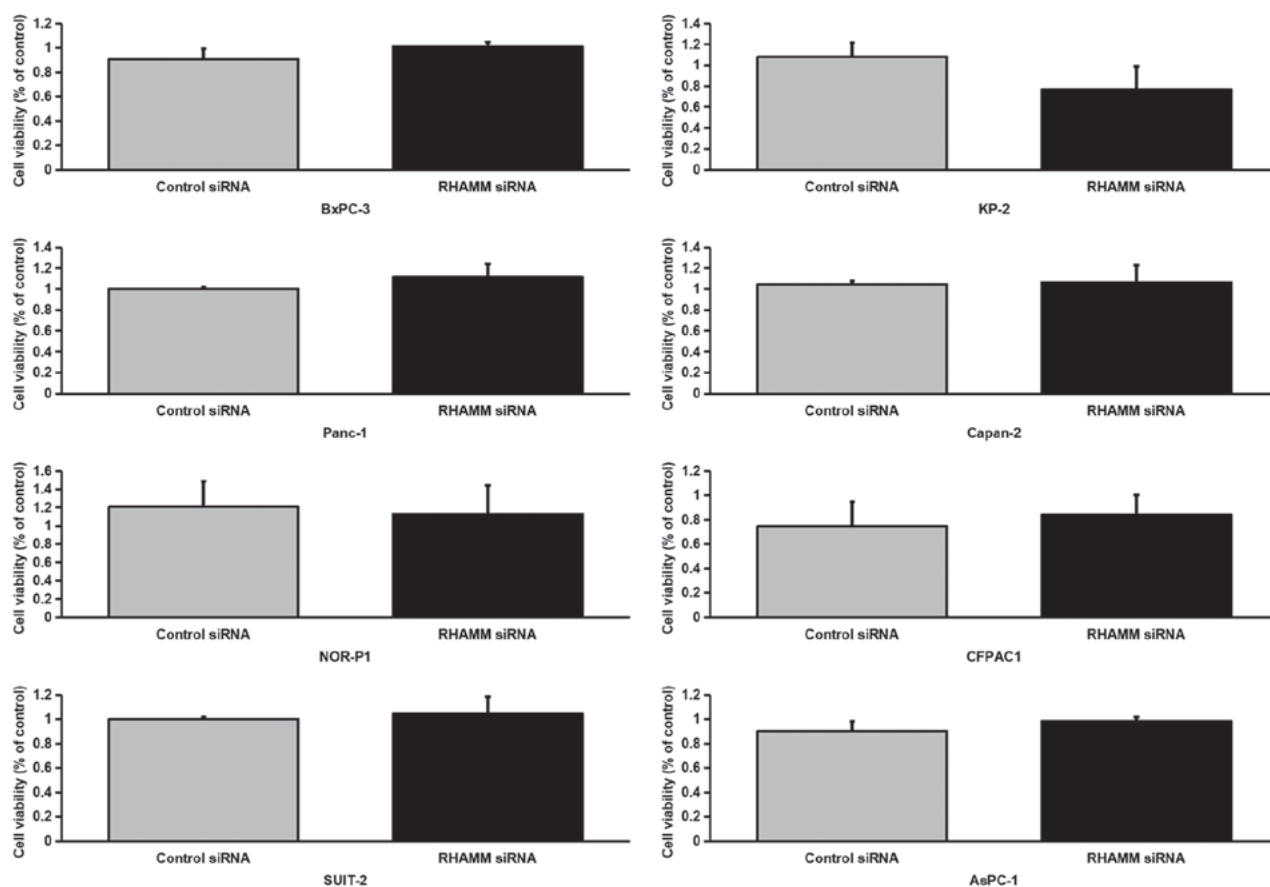

Supplement: Supplementary file 1 [file downloadSupplementary]
